# Supplementary material for: Catalogue of type specimens of fungi and lichens deposited in the Herbarium of the University of Granada (Spain)
Source: Biodivers Data J. 2015 Jul 13;(3):e5204. doi: 10.3897/BDJ.3.e5204 (PMC4549643; doi:10.3897/BDJ.3.e5204)
Supplement: Supplementary material 1 — GDA_type specimens_fungi [file biodiversity_data_journal-3-e5204-s001.xlsx]

## Sheet: Darwincore14
GlobalUniqueIdentifier	DateLastModified	BasisOfRecord	InstitutionCode	CollectionCode	CatalogNumber	TypeStatus	ScientificName	Kingdom	Order	Genus	SpecificEpithet	InfraspecificEpithet	InfraspecificRank	AuthorYearOfScientificName	Country	StateProvince	Locality	Remarks	MinimumElevationInMeters	MaximumElevationInMeters	EarliestDateCollected	LatestDateCollected	Collector	ImageURL	RelatedInformation	IdentifiedBy	DateIdentified	FieldNotes	TypeStatus	GenBankNumber	OtherCatalogNumbers	IndividualCount	DecimalLongitude	DecimalLatitude	CoordinateUncertaintyInMeters	VerbatimCoordinates	VerbatimCoordinateSystem
GDA:Fungi-GDA:50852-1-3	2014-03-14T11:00:46	PreservedSpecimen	GDA	Fungi-GDA	50852-1-3	Paratypus	Cortinarius haasii var. quercus-ilicicola A. Ortega, Suár.-Sant. & J.D. Reyes	Fungi	Agaricales	Cortinarius	haasii	quercus-ilicicola	var.	A. Ortega, Suár.-Sant. & J.D. Reyes	ES	J	Jaén, Parque Natural Sª de Cazorla, La Iruela - El Cantalar	encinar.	810	810	2005-11-19	2005-11-19	J.D. Reyes		Documenta M.T Vizoso según Fungal Diversity 29: 75 (2008)		01/02/2014		Paratypus of Cortinarius haasii var. quercus-ilicicola A. Ortega, Suár.-Sant. & J.D. Reyes, Fungal Diversity 29: 75 (2008)			1
GDA:Fungi-GDA:52537-1-1	2014-01-04T14:09:47	PreservedSpecimen	GDA	Fungi-GDA	52537-1-1	Holotypus	Cortinarius haasii var. quercus-ilicicola A.Ortega, Suár.-Sant. & J.D.Reyes	Fungi	Agaricales	Cortinarius	haasii	quercus-ilicicola	var.	A.Ortega, V.Suárez-Santiago & J.D.Reyes	ES	GR	Granada, Huétor Santillán, Parque Natural Sª de Huétor, camino forestal de las Pajareras km. 0,5	encinar.	1250	1250	2006-12-02	2006-12-02	A. Ortega	http://imagenes.gbif.es:8080/erez/fsi/fsi.swf?FPXSrc=GDA/TIPOS/CRIPTO/GDA52537.tif	HOLOTYPUS. Original incluido como subsp. pero publicado como variedad	A. Ortega & V. Suárez			Holotypus of Cortinarius haasii var. quercus-ilicicola A.Ortega, Suár.-Sant. & J.D.Reyes, Fungal Diversity 29: 75 (2008)	AM709874		1
GDA:Fungi-GDA:45877-1-2	2014-03-14T11:00:46	PreservedSpecimen	GDA	Fungi-GDA	45877-1-2	Paratypus	Cortinarius vernus var. nevadavernus Suár.-Sant. & A.Ortega	Fungi	Agaricales	Cortinarius	vernus	nevadavernus	var.	Suár.-Sant. & A.Ortega	ES	GR	Granada, Sª Nevada, Aldeire.	bajo Populus			1999-04-04	1999-04-04	A.Capilla		Documenta M.T Vizoso según Mycological Research 113(10): 1087 (2009)		01/03/2014		Paratypus of Cortinarius vernus var. nevadavernus Suár.-Sant. & A.Ortega in Suárez-Santiago, Ortega, Peintner & López-Flores, Mycol. Res. 113(10): 1087 (2009)			1
GDA:Fungi-GDA:45876-1-3	2014-03-14T11:00:46	PreservedSpecimen	GDA	Fungi-GDA	45876-1-3	Paratypus	Cortinarius vernus var. nevadavernus Suár.-Sant. & A.Ortega	Fungi	Agaricales	Cortinarius	vernus	nevadavernus	var.	Suár.-Sant. & A.Ortega	ES	GR	Granada, Sª Nevada, Aldeire.	bajo Populus			2000-04-17	2000-04-17	A.Capilla		Documenta M.T Vizoso según Mycological Research 113(10): 1087 (2009)		01/03/2014		Paratypus of Cortinarius vernus var. nevadavernus Suár.-Sant. & A.Ortega in Suárez-Santiago, Ortega, Peintner & López-Flores, Mycol. Res. 113(10): 1087 (2009)			1
GDA:Fungi-GDAC:44731-1-2	2014-01-04T14:09:47	PreservedSpecimen	GDA	Fungi-GDAC	44731-1-2	Holotypus	Cortinarius vernus var. nevadavernus Suár.-Sant. & A.Ortega	Fungi	Agaricales	Cortinarius	vernus	nevadavernus	var.	Suár.-Sant. & A.Ortega	ES	GR	Granada, Huéneja	bajo Juglans regia y Pinus nigra	1300	1300	1996-05-12	1996-05-12	A. Capilla	http://imagenes.gbif.es:8080/erez/fsi/fsi.swf?FPXSrc=GDA/TIPOS/CRIPTO/GDAC44731.tif	HOLOTYPUS	A. Ortega			Holotypus of Cortinarius vernus var. nevadavernus Suár.-Sant. & A.Ortega, in Suárez-Santiago, Ortega, Peintner & López-Flores, Mycol. Res. 113(10): 1087 (2009)	FN429009		1
GDA:Fungi-GDA:52539-1-3	2014-03-14T11:00:46	PreservedSpecimen	GDA	Fungi-GDA	52539-1-3	Paratypus	Cortinarius haasii var. quercus-ilicicola A. Ortega, Suár.-Sant. & J.D. Reyes	Fungi	Agaricales	Cortinarius	haasii	quercus-ilicicola	var.	A. Ortega, Suár.-Sant. & J.D. Reyes	ES	J	Jaén, Parque Natural Sª de Segura, Siles, La Laguna	encinar.	1350	1350	2005-11-17	2005-11-17	J.D. Reyes		Documenta M.T Vizoso según Fungal Diversity 29: 75 (2008)				Paratypus of Cortinarius haasii var. quercus-ilicicola A. Ortega, Suár.-Sant. & J.D. Reyes, Fungal Diversity 29: 75 (2008)			1
GDA:Fungi-GDAC:41654-1-1	2014-01-04T14:09:47	PreservedSpecimen	GDA	Fungi-GDAC	41654-1-1	Holotypus	Cortinarius croceocaeruleus var. meridionalis Bidaud, A.Ortega & Mahiques	Fungi	Agaricales	Cortinarius	croceocaeruleus	meridionalis	var.	Bidaud, Ortega & Mahiques	ES	V	Valencia, Els Surars (Pinet)	bajo Quercus suber, Cistus crispus y Cistus salvifolius			1995-10-20	1995-10-20	R. Mahiques	http://imagenes.gbif.es:8080/erez/fsi/fsi.swf?FPXSrc=GDA/TIPOS/CRIPTO/GDAC41654.tif; http://imagenes.gbif.es:8080/erez/fsi/fsi.swf?FPXSrc=GDA/TIPOS/CRIPTO/GDAC41654_foto.tif	HOLOTYPUS. Incluye diapositiva	A. Ortega			Holotypus of Cortinarius croceocaeruleus var. meridionalis Bidaud, A.Ortega & Mahiques, in Ortega, Bidaud & Mahiques, Cryptog. Mycol. 18(3): 229 (1997)		MES 2545	1
GDA:Fungi-GDA:50854-1-3	2014-03-14T11:00:46	PreservedSpecimen	GDA	Fungi-GDA	50854-1-3	Paratypus	Cortinarius haasii var. quercus-ilicicola A. Ortega, Suár.-Sant. & J.D. Reyes	Fungi	Agaricales	Cortinarius	haasii	quercus-ilicicola	var.	A. Ortega, Suár.-Sant. & J.D. Reyes	ES	J	Jaén, Parque Natural Sª de Cazorla, La Iruela - El Cantalar	encinar.	810	810	2005-11-19	2005-11-19	J.D. Reyes		Documenta M.T Vizoso según Fungal Diversity 29: 75 (2008)		01/02/2014		Paratypus of Cortinarius haasii var. quercus-ilicicola A. Ortega, Suár.-Sant. & J.D. Reyes, Fungal Diversity 29: 75 (2008)	AM709873		1
GDA:Fungi-GDAC:41046-1-3	2014-03-14T11:00:46	PreservedSpecimen	GDA	Fungi-GDAC	41046-1-3	Paratypus	Cortinarius vernus var. nevadavernus Suár.-Sant. & A.Ortega	Fungi	Agaricales	Cortinarius	vernus	nevadavernus	var.	Suár.-Sant. & A.Ortega	ES	GR	Granada, Huéneja.	bajo Populus			1996-05-16	1996-05-16	A.Capilla		Documenta M.T Vizoso según Mycological Research 113(10): 1087 (2009)				Paratypus of Cortinarius vernus var. nevadavernus Suár.-Sant. & A.Ortega in Suárez-Santiago, Ortega, Peintner & López-Flores, Mycol. Res. 113(10): 1087 (2009)	FN429007 | FN429008		1
GDA:Fungi-GDAC:42279-1-2	2014-01-04T14:09:47	PreservedSpecimen	GDA	Fungi-GDAC	42279-1-2	Isotypus	Entoloma griseocyaneum var. glyociosmus Esteve-Rav. & A.Ortega	Fungi	Agaricales	Entoloma	griseocyaneum	glyociosmus	var.	Esteve-Rav. & A.Ortega	ES	GR	Granada, Sierra Nevada, Campos de Otero	pastizales húmedos.	2200	2500	1997-07-17	1997-07-17	A. Ortega	http://imagenes.gbif.es:8080/erez/fsi/fsi.swf?FPXSrc=GDA/TIPOS/CRIPTO/GDAC42279.tif; http://imagenes.gbif.es:8080/erez/fsi/fsi.swf?FPXSrc=GDA/TIPOS/CRIPTO/GDAC42279_doc01.tif	ISOTYPUS. Duplo en AH 23426 (Holotypus). Incluye notas microscopía	F. Esteve-Rav.			Isotypus of Entoloma griseocyaneum var. glyociosmus Esteve-Rav. & A.Ortega in Mycotaxon 71: 96 (1999)		AH 23426 (Holotypus)	1
GDA:Fungi-GDA:51987-1-2	2014-01-04T14:09:47	PreservedSpecimen	GDA	Fungi-GDA	51987-1-2	Epitypus	Cortinarius caerulescens var. praetermissus (Bergeron ex Reumaux) A.Ortega & Moënne-Locc.	Fungi	Agaricales	Cortinarius	caerulescens	praetermissus	var.	(Bergeron ex Reumaux) A.Ortega & Moënne-Locc.	ES	NA	Exposición Micológica de Pamplona				1980-10-25	1980-10-25	L.M. García Bona	http://imagenes.gbif.es:8080/erez/fsi/fsi.swf?FPXSrc=GDA/TIPOS/CRIPTO/GDA51987.tif	EPITYPUS. Documenta M.T.Vizoso según Docums Mycol. 32(127-128): 38 (2003)		2013-01		Epitypus of Cortinarius caerulescens var. praetermissus (Bergeron ex Reumaux) A. Ortega & Moënne-Locc., Docums Mycol. 32(127-128): 38 (2003)			1
GDA:Fungi-GDA:44739-1-2	2014-01-04T14:09:47	PreservedSpecimen	GDA	Fungi-GDA	44739-1-2	Neotypus	Gymnopus dryophilus var. lanipes (Malençon & Bertault) A.Ortega, Antonín & Esteve-Rav.	Fungi	Agaricales	Gymnopus	dryophilus	lanipes	var.	(Malençon & Bertault) Ortega, Antonin & Esteve-Raventós	ES	MA	Málaga, Venta Garvey, carretera de Colmenar a Málaga	pinar aclarado.			2000-11-10	2000-11-10	L. Alcoba & A. Ortega	http://imagenes.gbif.es:8080/erez/fsi/fsi.swf?FPXSrc=GDA/TIPOS/CRIPTO/GDA44739.tif; http://imagenes.gbif.es:8080/erez/fsi/fsi.swf?FPXSrc=GDA/TIPOS/CRIPTO/GDA44739_doc01.tif	NEOTYPUS. Incluye anotaciones, medidas y dibujos de su microscopía	A. Ortega			Neotypus of Gymnopus dryophilus var. lanipes (Malençon & Bertault) A.Ortega, Antonín & Esteve-Rav., Mycotaxon 85: 73 (2003)			1
GDA:Fungi-GDAC:31723-1-2	2014-01-04T14:09:47	PreservedSpecimen	GDA	Fungi-GDAC	31723-1-2	Holotypus	Hydropus floccipes var. luteipes A.Ortega & M.Zea	Fungi	Agaricales	Hydropus	floccipes	luteipes	var.	A.Ortega & M.Zea	ES	CA	Cádiz, Sierra de la Luna	sobre un tronco vivo de Quercus suber, entre el musgo			1988-12-02	1988-12-02	A. Ortega, M.T.Vizoso & M. Zea	http://imagenes.gbif.es:8080/erez/fsi/fsi.swf?FPXSrc=GDA/TIPOS/CRIPTO/GDAC31723.tif; http://imagenes.gbif.es:8080/erez/fsi/fsi.swf?FPXSrc=GDA/TIPOS/CRIPTO/GDAC31723_doc01a.tif; http://imagenes.gbif.es:8080/erez/fsi/fsi.swf?FPXSrc=GDA/TIPOS/CRIPTO/GDAC31723_doc01r.tif; http://imagenes.gbif.es:8080/erez/fsi/fsi.swf?FPXSrc=GDA/TIPOS/CRIPTO/GDAC31723_cuticula.tif	Documenta M.T. Vizoso según Bol. Soc. Micol. Madrid 15: 189 (1991)				Holotypus of Hydropus floccipes var. luteipes A.Ortega & M.Zea, Bol. Soc. Micol. Madrid 15: 189 (1991)			1
GDA:Fungi-GDAC:39053-1-6	2014-01-04T14:09:47	PreservedSpecimen	GDA	Fungi-GDAC	39053-1-6	Holotypus	Conocybe arrhenii var. squamosipes A.Ortega & Esteve-Rav.	Fungi	Agaricales	Conocybe	arrhenii	squamosipes	var.	A.Ortega & Esteve-Rav.	ES	CO	Córdoba, Quintilla, Arroyo Gámiz	bajo Ulmus minor en lugares húmedos.			1994-12-02	1994-12-02	J. Gámez & B. Moreno	http://imagenes.gbif.es:8080/erez/fsi/fsi.swf?FPXSrc=GDA/TIPOS/CRIPTO/GDAC39053.tif; http://imagenes.gbif.es:8080/erez/fsi/fsi.swf?FPXSrc=GDA/TIPOS/CRIPTO/GDAC39053_doc01a.tif; http://imagenes.gbif.es:8080/erez/fsi/fsi.swf?FPXSrc=GDA/TIPOS/CRIPTO/GDAC39053_doc01r.tif; http://imagenes.gbif.es:8080/erez/fsi/fsi.swf?FPXSrc=GDA/TIPOS/CRIPTO/GDAC39053_doc02.tif	Documenta M.T. Vizoso según Nova Hedwigia 67(1-2): 108 (1998)		2013-01		Holotypus of Conocybe arrhenii var. squamosipes A.Ortega & Esteve-Rav., Nova Hedwigia 67(1-2): 108 (1998)		Herb. SMSS, nº 720	1
GDA:Fungi-GDAC:44798-1-1	2014-01-04T14:09:47	PreservedSpecimen	GDA	Fungi-GDAC	44798-1-1	Holotypus	Marasmiellus virgatocutis var. parvisporus Esteve-Rav. & A.Ortega	Fungi	Agaricales	Marasmiellus	virgatocutis	parvisporus	var.	Esteve-Raventós & Ortega	ES	MA	Málaga, Coín	alcornocal			1989-12-14	1989-12-14	A. Ortega	http://imagenes.gbif.es:8080/erez/fsi/fsi.swf?FPXSrc=GDA/TIPOS/CRIPTO/GDAC44798.tif; http://imagenes.gbif.es:8080/erez/fsi/fsi.swf?FPXSrc=GDA/TIPOS/CRIPTO/GDAC44798_doc01a.tif; http://imagenes.gbif.es:8080/erez/fsi/fsi.swf?FPXSrc=GDA/TIPOS/CRIPTO/GDAC44798_doc01r.tif; http://imagenes.gbif.es:8080/erez/fsi/fsi.swf?FPXSrc=GDA/TIPOS/CRIPTO/GDAC44798_doc02.tif; http://imagenes.gbif.es:8080/erez/fsi/f…	Incluye anotaciones del autor de determinación	A. Ortega			Holotypus of Marasmiellus virgatocutis var. parvisporus Esteve-Rav. & A.Ortega, Bol. Soc. Micol. Madrid 27: 64 (2003)			1
GDA:Fungi-GDA:52538-1-2	2014-03-14T11:00:46	PreservedSpecimen	GDA	Fungi-GDA	52538-1-2	Paratypus	Cortinarius haasii var. quercus-ilicicola A. Ortega, Suár.-Sant. & J.D. Reyes	Fungi	Agaricales	Cortinarius	haasii	quercus-ilicicola	var.	A. Ortega, Suár.-Sant. & J.D. Reyes	ES	J	Jaén, Parque Natural Sª de Segura, Siles, La Laguna	encinar.	1350	1350	2005-11-17	2005-11-17	J.D. Reyes		Documenta M.T Vizoso según Fungal Diversity 29: 75 (2008)				Paratypus of Cortinarius haasii var. quercus-ilicicola A. Ortega, Suár.-Sant. & J.D. Reyes, Fungal Diversity 29: 75 (2008)			1
GDA:Fungi-GDA:59093-1-1	2014-01-04T14:09:47	PreservedSpecimen	GDA	Fungi-GDA	59093-1-1	Isotypus	Cortinarius assiduus var. plesiocistus A.Ortega, Vila & Bidaud	Fungi	Agaricales	Cortinarius	assiduus	plesiocistus	var.	A. Ortega et. al.	ES	GE	Gerona, Alto Empordá, Cadaqués, Cala Jonquet	bajo Cistus monspeliensis	40	40	1999-01-25	1999-01-25	J. Vila & X. Llimona	http://imagenes.gbif.es:8080/erez/fsi/fsi.swf?FPXSrc=GDA/TIPOS/CRIPTO/GDA59093.tif; http://imagenes.gbif.es:8080/erez/fsi/fsi.swf?FPXSrc=GDA/TIPOS/CRIPTO/GDA59093_doc01.tif; http://imagenes.gbif.es:8080/erez/fsi/fsi.swf?FPXSrc=GDA/TIPOS/CRIPTO/GDA59093_doc02.tif; http://imagenes.gbif.es:8080/erez/fsi/fsi.swf?FPXSrc=GDA/TIPOS/CRIPTO/GDA59093_foto.tif	ISOTYPUS	A. Ortega		incluye medidas esporales y ficha de la Societat Catalana de Micologia	Isotypus of Cortinarius assiduus var. plesiocistus A.Ortega, Vila & Bidaud, in Ortega, Vila, Bidaud, Mahiques & Contu, Mycotaxon 101: 140 (2007)		Duplicado de JVG990125-31	1
GDA:Fungi-GDA:52535-1-1	2014-01-04T14:09:47	PreservedSpecimen	GDA	Fungi-GDA	52535-1-1	Holotypus	Cortinarius assiduus var. plesiocistus A.Ortega, Vila & Bidaud	Fungi	Agaricales	Cortinarius	assiduus	plesiocisti	var.	A.Ortega et al.	ES	GE	Gerona, Cadaqués, Alt Empordá, Cala Jonquet	Cistus monspeliensis.	40	40	1999-01-25	1999-01-25	J. Vila & X. Llimona	http://imagenes.gbif.es:8080/erez/fsi/fsi.swf?FPXSrc=GDA/TIPOS/CRIPTO/GDA52535.tif	HOLOTYPUS	J. Vila		assiduus var. 990125-31 (material para holótipo)	Holotypus of Cortinarius assiduus var. plesiocistus A.Ortega, Vila & Bidaud, in Ortega, Vila, Bidaud, Mahiques & Contu, Mycotaxon 101: 140 (2007)			1
GDA:Fungi-GDAC:44974-1-2	2014-03-14T11:00:46	PreservedSpecimen	GDA	Fungi-GDAC	44974-1-2	Paratypus	Gymnopus dryophilus var. lanipes (Malençon & Bertault) A.Ortega, Antonín & Esteve-Rav.	Fungi	Agaricales	Gymnopus	dryophilus	lanipes	var.	(Malençon & Bertault) A.Ortega, Antonín & Esteve-Rav.	ES	MA	Málaga, Yunquera, Puerto de La Caína.	bajo Cistus			1995-11-30	1995-11-30	F.Esteve-Raventós, E.Horak, G.Moreno & A.Ortega		Documenta M.T Vizoso según Mycotaxon 85: 73 (2003)		01/03/2014		Paratypus of Gymnopus dryophilus var. lanipes (Malençon & Bertault) A.Ortega, Antonín & Esteve-Raventós, Mycotaxon 85: 73 (2003)			1
GDA:Fungi-GDAC:42754-1-4	2014-03-14T11:00:46	PreservedSpecimen	GDA	Fungi-GDAC	42754-1-4	Paratypus	Gymnopus dryophilus var. lanipes (Malençon & Bertault) A.Ortega, Antonín & Esteve-Rav.	Fungi	Agaricales	Gymnopus	dryophilus	lanipes	var.	(Malençon & Bertault) A.Ortega, Antonín & Esteve-Rav.	ES	GR	Granada, Parque Natural de la Sª de Huétor, Bolones.	pinar			1996-01-02	1996-01-02	A.Ortega & L.Alcoba		Documenta M.T Vizoso según Mycotaxon 85: 73 (2003)		01/03/2014		Paratypus of Gymnopus dryophilus var. lanipes (Malençon & Bertault) A.Ortega, Antonín & Esteve-Raventós, Mycotaxon 85: 73 (2003)			1
GDA:Fungi-GDAC:10328-1-4	2014-03-14T11:00:46	PreservedSpecimen	GDA	Fungi-GDAC	10328-1-4	Paratypus	Gymnopus dryophilus var. lanipes (Malençon & Bertault) A.Ortega, Antonín & Esteve-Rav.	Fungi	Agaricales	Gymnopus	dryophilus	lanipes	var.	(Malençon & Bertault) A.Ortega, Antonín & Esteve-Rav.	ES	GR	Granada, Sª Elvira.	encinar			1979-10-28	1979-10-28	R.Galán		Documenta M.T Vizoso según Mycotaxon 85: 73 (2003)		01/03/2014		Paratypus of Gymnopus dryophilus var. lanipes (Malençon & Bertault) A.Ortega, Antonín & Esteve-Raventós, Mycotaxon 85: 73 (2003)			1
GDA:Fungi-GDA:44741-1-2	2014-03-14T11:00:46	PreservedSpecimen	GDA	Fungi-GDA	44741-1-2	Paratypus	Gymnopus dryophilus var. lanipes (Malençon & Bertault) A.Ortega, Antonín & Esteve-Rav.	Fungi	Agaricales	Gymnopus	dryophilus	lanipes	var.	(Malençon & Bertault) A.Ortega, Antonín & Esteve-Rav.	ES	SE	Sevilla, Aznalcázar, Pinar de Aznalcázar.	pinar.			2001-03-31	2001-03-31	L.Alcoba & A.Ortega		Documenta M.T Vizoso según Mycotaxon 85: 73 (2003)		01/03/2014		Paratypus of Gymnopus dryophilus var. lanipes (Malençon & Bertault) A.Ortega, Antonín & Esteve-Raventós, Mycotaxon 85: 73 (2003)			1
GDA:Fungi-GDA:44740-1-2	2014-03-14T11:00:46	PreservedSpecimen	GDA	Fungi-GDA	44740-1-2	Paratypus	Gymnopus dryophilus var. lanipes (Malençon & Bertault) A.Ortega, Antonín & Esteve-Raventós	Fungi	Agaricales	Gymnopus	dryophilus	lanipes	var.	(Malençon & Bertault) A.Ortega, Antonín & Esteve-Raventós	ES	SE	Sevilla, Aznalcázar, Pinar de Aznalcázar.	bajo Pinus pinea.			2000-11-18	2000-11-18	L.Alcoba & A.Ortega		Documenta M.T Vizoso según Mycotaxon 85: 73 (2003)		01/03/2014		Paratypus of Gymnopus dryophilus var. lanipes (Malençon & Bertault) A.Ortega, Antonín & Esteve-Raventós, Mycotaxon 85: 73 (2003)			1
GDA:Fungi-GDA:53682-1-1	2014-01-04T14:09:47	PreservedSpecimen	GDA	Fungi-GDA	53682-1-1	Isotypus	Cortinarius croceocaeruleus var. meridionalis Bidaud, A.Ortega & Mahiques	Fungi	Agaricales	Cortinarius	croceocaeruleus	meridionalis	var.	Bidaud et al.	ES	V	Valencia, Els Surars, Pinet	bajo Quercus suber.			1995-10-20	1995-10-20	R. Mahiques	http://imagenes.gbif.es:8080/erez/fsi/fsi.swf?FPXSrc=GDA/TIPOS/CRIPTO/GDA53682.tif	ISOTYPUS	A. Ortega			Isotypus of Cortinarius croceocaeruleus var. meridionalis Bidaud, A.Ortega & Mahiques, in Ortega, Bidaud & Mahiques, Cryptog. Mycol. 18(3): 229 (1997)		MES 2545	1
GDA:Fungi-GDA:44814-1-1	2014-01-04T14:09:47	PreservedSpecimen	GDA	Fungi-GDA	44814-1-1	Holotypus	Cortinarius caesiostramineus var. cadinanos-aguirrei Moënne-Locc. & A.Ortega	Fungi	Agaricales	Cortinarius	caesiostramineus	cadinanos-aguirrei	var.	Moënne-Locc. & A.Ortega	ES	BU	Burgos, Barrasa de Mena	bajo Quercus faginea			1999-11-20	1999-11-20	J.A. Cadiñanos Aguirre	http://imagenes.gbif.es:8080/erez/fsi/fsi.swf?FPXSrc=GDA/TIPOS/CRIPTO/GDA44814.tif; http://imagenes.gbif.es:8080/erez/fsi/fsi.swf?FPXSrc=GDA/TIPOS/CRIPTO/GDA44814_doc01.tif	HOLOTYPUS	A. Ortega			Holotypus of Cortinarius caesiostramineus var. cadinanos-aguirrei Moënne-Locc. & A.Ortega in A.Ortega & Mahiques, Mycotaxon 83: 438 (2002)		9373 v	1
GDA:Fungi-GDA:45836-1-4	2014-01-04T14:09:47	PreservedSpecimen	GDA	Fungi-GDA	45836-1-4	Holotypus	Baeospora myosura f. xeruloides A.Ortega & Esteve-Rav.	Fungi	Agaricales	Baeospora	myosura	xeruloides	forma	A.Ortega & Esteve-Rav.	ES	GR	Granada, Parque Natural de Sª Nevada, Huéneja	pinar			1999-11-05	1999-11-05	A. Capilla	http://imagenes.gbif.es:8080/erez/fsi/fsi.swf?FPXSrc=GDA/TIPOS/CRIPTO/GDA45836.tif; http://imagenes.gbif.es:8080/erez/fsi/fsi.swf?FPXSrc=GDA/TIPOS/CRIPTO/GDA45836_doc01.tif	Documenta M.T. Vizoso según Bol. Soc. Micol. Madrid 27: 63 (2003)		2013-01		Holotypus of Baeospora myosura f. xeruloides A.Ortega & Esteve-Rav., in Esteve-Raventós & Ortega, Bol. Soc. Micol. Madrid 27: 63 (2003)			1
GDA:Fungi-GDA:54298-1-1	2014-01-04T14:09:47	PreservedSpecimen	GDA	Fungi-GDA	54298-1-1	Holotypus	Cortinarius mahiquesii Vila, A.Ortega & Suár.-Sant.	Fungi	Agaricales	Cortinarius	mahiquesii			Vila, A.Ortega & Suár.-Sant.	ES	B	Barcelona, Perafita, El Port de la Selva	bajo Cistus monspeniensis, semihipogeo	240	240	2008-01-18	2008-01-18	J. Vila & X. Llimona	http://imagenes.gbif.es:8080/erez/fsi/fsi.swf?FPXSrc=GDA/TIPOS/CRIPTO/GDA54298.tif; http://imagenes.gbif.es:8080/erez/fsi/fsi.swf?FPXSrc=GDA/TIPOS/CRIPTO/GDA54298_doc01.tif; http://imagenes.gbif.es:8080/erez/fsi/fsi.swf?FPXSrc=GDA/TIPOS/CRIPTO/GDA54298_doc02.tif; http://imagenes.gbif.es:8080/erez/fsi/fsi.swf?FPXSrc=GDA/TIPOS/CRIPTO/GDA54298_doc03.tif	HOLOTYPUS. Persoonia 21: 154 (2008)	A. Ortega			Holotypus of Cortinarius mahiquesii Vila, A.Ortega & Suár.-Sant., Persoonia 21: 154 (2008)		Isotypus en JVG 1080118-18	1
GDA:Fungi-GDA:53683-1-1	2014-01-04T14:09:47	PreservedSpecimen	GDA	Fungi-GDA	53683-1-1	Isotypus	Cortinarius assiduus Mahiques, A.Ortega & Bidaud	Fungi	Agaricales	Cortinarius	assiduus			Mahiques et al.	ES	V	Valencia, Els Surars, Pinet	Quercus coccifera, Quercus rotundifolia, Quercus pyrenaica y Quercus suber	660	660	1999-11-18	1999-11-18	R. Mahiques	http://imagenes.gbif.es:8080/erez/fsi/fsi.swf?FPXSrc=GDA/TIPOS/CRIPTO/GDA53683.tif	ISOTYPUS	R. Mahiques			Isotypus of Cortinarius assiduus Mahiques, A. Ortega & Bidaud, Bull. trimest. Féd. Mycol. Dauphiné-Savoie 41(162): 42 (2001)		MES - 3541	1
GDA:Fungi-GDA:47385-1-2	2014-01-04T14:09:47	PreservedSpecimen	GDA	Fungi-GDA	47385-1-2	Isotypus	Gymnopilus arenophilus A.Ortega & Esteve-Rav.	Fungi	Agaricales	Gymnopilus	arenophilus			A.Ortega & Esteve-Rav.	ES	SE	Sevilla, Aznalcózar, Pinar de Aznalcózar	madera de pino enterrada (suelos quemados).			2000-12-02	2000-12-02	L. Alcoba & A. Ortega	http://imagenes.gbif.es:8080/erez/fsi/fsi.swf?FPXSrc=GDA/TIPOS/CRIPTO/GDA47385.tif; http://imagenes.gbif.es:8080/erez/fsi/fsi.swf?FPXSrc=GDA/TIPOS/CRIPTO/GDA47385_doc01.tif	ISOTYPUS. Revisado en el propio sobre.	A. Ortega	2006-10		Isotypus of Gymnopilus arenophilus A.Ortega & Esteve-Rav., Persoonia 18(4): 506 (2005)			1
GDA:Fungi-GDAC:44213-1-1	2014-01-04T14:09:47	PreservedSpecimen	GDA	Fungi-GDAC	44213-1-1	Holotypus	Cortinarius erythrofuscus Mahiques & A.Ortega	Fungi	Agaricales	Cortinarius	erythrofuscus			Mahiques & A.Ortega	ES	GU	Guadalajara, Ciruelos del Pinar	bajo Quercus pyrenaica			1998-11-19	1998-11-19	R. Mahiques	http://imagenes.gbif.es:8080/erez/fsi/fsi.swf?FPXSrc=GDA/TIPOS/CRIPTO/GDAC44213.tif	HOLOTYPUS. secuenciado. contiene anotaciónes del autor de la revisión				Holotypus of Cortinarius erythrofuscus Mahiques & A.Ortega, Persoonia 17(4): 657 (2002)		MES 3351	1
GDA:Fungi-GDA:52551-1-1	2014-01-04T14:09:47	PreservedSpecimen	GDA	Fungi-GDA	52551-1-1	Holotypus	Cortinarius cistovelatus Vila, A.Ortega & Bidaud	Fungi	Agaricales	Cortinarius	cistovelatus			Vila, Bidaud & A. Ortega	ES	B	Barcelona, Alt. Penedes, El Maid, Mediona	bajo Cistus monspeliensis, en suelo ácido	385	385	2002-10-29	2002-10-29	J. Vila & X. Llimona	http://imagenes.gbif.es:8080/erez/fsi/fsi.swf?FPXSrc=GDA/TIPOS/CRIPTO/GDA52551.tif	HOLOTYPUS (isotypus in JVG 1021029-5)	A. Bidaud			Holotypus of Cortinarius cistovelatus Vila, A.Ortega & Bidaud, Bull. Soc. mycol. Fr. 123(3-4): 222 (2007)			1
GDA:Fungi-GDAC:10332-1-2	2014-01-04T14:09:47	PreservedSpecimen	GDA	Fungi-GDAC	10332-1-2	Holotypus	Gymnopus pubipes Antonín, A.Ortega & Esteve-Rav.	Fungi	Agaricales	Gymnopus	pubipes			Antonin, Ortega & Esteve-Raventós	ES	GR	Granada, camino del Campamento de la Alfaguara	encinar			1977-10-18	1977-10-18	G. Malençon, X. Llimona & A. Ortega	http://imagenes.gbif.es:8080/erez/fsi/fsi.swf?FPXSrc=GDA/TIPOS/CRIPTO/GDAC10332.tif; http://imagenes.gbif.es:8080/erez/fsi/fsi.swf?FPXSrc=GDA/TIPOS/CRIPTO/GDAC10332_doc01.tif; http://imagenes.gbif.es:8080/erez/fsi/fsi.swf?FPXSrc=GDA/TIPOS/CRIPTO/GDAC10332_doc02.tif	HOLOTYPUS. Incluye anotaciones y medidas de la microscopía	G. Malençon			Holotypus of Gymnopus pubipes Antonín, A.Ortega & Esteve-Rav., in Ortega, Antonín & Esteve-Raventós, Mycotaxon 85: 69 (2003)			1
GDA:Fungi-GDA:53699-1-1	2014-01-04T14:09:47	PreservedSpecimen	GDA	Fungi-GDA	53699-1-1	Holotypus	Cortinarius inusitatus A.Ortega, Bidaud, Suár.-Sant. & Vila	Fungi	Agaricales	Cortinarius	inusitatus			A.Ortega, Bidaud, Suár.-Sant. & Vila	ES	GR	Granada, P.N. Sª de Huétor, camino Forestal las Pajareras, km 0.5	encinar.	1250	1250	2006-11-26	2006-11-26	A. Ortega	http://imagenes.gbif.es:8080/erez/fsi/fsi.swf?FPXSrc=GDA/TIPOS/CRIPTO/GDA53699.tif; http://imagenes.gbif.es:8080/erez/fsi/fsi.swf?FPXSrc=GDA/TIPOS/CRIPTO/GDA53699_doc01.tif	HOLOTYPUS. GARN 9248	A. Ortega			Holotypus of Cortinarius inusitatus A.Ortega, Bidaud, Suár.-Sant. & Vila in Ortega, Suár.-Sant. & Vila, Fungal Diversity 36: 91 (2009)	FM202128		1
GDA:Fungi-GDA:47384-1-2	2014-01-04T14:09:47	PreservedSpecimen	GDA	Fungi-GDA	47384-1-2	Holotypus	Gymnopilus arenophilus A.Ortega & Esteve-Rav.	Fungi	Agaricales	Gymnopilus	arenophilus			A.Ortega & Esteve-Rav.	ES	SE	Sevilla, Aznalcázar, Pinar de Aznalcázar	restos vegetales, madera, en zonas aclarados, suelo arenosos, suelos quemados?			2000-12-02	2000-12-02	A. Ortega & L. Alcoba	http://imagenes.gbif.es:8080/erez/fsi/fsi.swf?FPXSrc=GDA/TIPOS/CRIPTO/GDA47384.tif; http://imagenes.gbif.es:8080/erez/fsi/fsi.swf?FPXSrc=GDA/TIPOS/CRIPTO/GDA47384_doc01.tif; http://imagenes.gbif.es:8080/erez/fsi/fsi.swf?FPXSrc=GDA/TIPOS/CRIPTO/GDA47384_doc02.tif	HOLOTYPUS. Incluye anotaciones y medidas del pileipellis.	A. Ortega			Holotypus of Gymnopilus arenophilus A.Ortega & Esteve-Rav., Persoonia 18(4): 506 (2005)			1
GDA:Fungi-GDA:53709-1-1	2014-01-04T14:09:47	PreservedSpecimen	GDA	Fungi-GDA	53709-1-1	Holotypus	Cortinarius viscidoamarus A.Ortega & Suár.-Sant.	Fungi	Agaricales	Cortinarius	viscidoamarus			A. Ortega & Suár.-Sant.	ES	GR	Granada, P.N. Sª de Huétor, camino Forestal las Pajareras, km 0.5	encinar.	1250	1250	2007-01-05	2007-01-05	A. Ortega	http://imagenes.gbif.es:8080/erez/fsi/fsi.swf?FPXSrc=GDA/TIPOS/CRIPTO/GDA53709.tif; http://imagenes.gbif.es:8080/erez/fsi/fsi.swf?FPXSrc=GDA/TIPOS/CRIPTO/GDA53709_doc01.tif	HOLOTYPUS	A. Ortega			Holotypus of Cortinarius viscidoamarus A.Ortega & Suár.-Sant. in Ortega, Suár.-Sant. & Vila, Fungal Diversity 36: 95 (2009)	FM202137		1
GDA:Fungi-GDA:45985-1-1	2014-01-04T14:09:47	PreservedSpecimen	GDA	Fungi-GDA	45985-1-1	Holotypus	Coprinus alcobae A.Ortega	Fungi	Agaricales	Coprinus	alcobae			A.Ortega	ES	SE	Sevilla, Aznalcázar, Pinares de Aznalcázar	suelos arenosos			2001-10-26	2001-10-26	L. Alcoba & A. Ortega	http://imagenes.gbif.es:8080/erez/fsi/fsi.swf?FPXSrc=GDA/TIPOS/CRIPTO/GDA45985.tif; http://imagenes.gbif.es:8080/erez/fsi/fsi.swf?FPXSrc=GDA/TIPOS/CRIPTO/GDA45985_carpoforo.tif; http://imagenes.gbif.es:8080/erez/fsi/fsi.swf?FPXSrc=GDA/TIPOS/CRIPTO/GDA45985_esporas.tif; http://imagenes.gbif.es:8080/erez/fsi/fsi.swf?FPXSrc=GDA/TIPOS/CRIPTO/GDA45985_doc01.tif; http://imagenes.gbif.es:8080/erez/fsi/f…	HOLOTYPUS. Incluye foto electrónica de esporas y foto de la muestra.	A. Ortega			Holotypus of Coprinus alcobae A.Ortega, in Ortega Díaz & Esteve-Raventós, Nova Hedwigia 76(3-4): 466 (2003)			1
GDA:Fungi-GDA:43817-1-1	2014-01-04T14:09:47	PreservedSpecimen	GDA	Fungi-GDA	43817-1-1	Paratypus	Mycena dunicola M. Villarreal, Esteve-Rav., Barrasa & A.Ortega	Fungi	Agaricales	Mycena	dunicola			Esteve-Rav., M.Villareal, Barrasa & A.Ortega	ES	SE	Sevilla, Aznalcázar, pinar de Aznalcázar	suelos arenosos, bajo Pinus.			2000-12-02	2000-12-02	L. Alcoba & A. Ortega	http://imagenes.gbif.es:8080/erez/fsi/fsi.swf?FPXSrc=GDA/TIPOS/CRIPTO/GDA43817.tif; http://imagenes.gbif.es:8080/erez/fsi/fsi.swf?FPXSrc=GDA/TIPOS/CRIPTO/GDA43817_doc01.tif	PARATYPUS. Incluye descripción macro y microscópica y medidas esporas	F. Esteve-Raventós			Paratypus of Mycena dunicola M. Villarreal, Esteve-Rav., Barrasa & A. Ortega, in Esteve-Raventós, Villarreal, Barrasa & Ortega, Mycotaxon 80: 308 (2001)			1				30SQB2545	UTM
GDA:Fungi-GDA:53691-1-1	2014-01-04T14:09:47	PreservedSpecimen	GDA	Fungi-GDA	53691-1-1	Holotypus	Cortinarius xanthosarx Vila, A.Ortega & Bidaud	Fungi	Agaricales	Cortinarius	xanthosarx			Vila, A.Ortega & Bidaud	ES	T	Tarragona, Vilanova de Prades, Corral de Sanç	under Cistus laurifolius, acid soil.	1005	1005	2001-10-23	2001-10-23	X. Llimona & J. Vila	http://imagenes.gbif.es:8080/erez/fsi/fsi.swf?FPXSrc=GDA/TIPOS/CRIPTO/GDA53691.tif; http://imagenes.gbif.es:8080/erez/fsi/fsi.swf?FPXSrc=GDA/TIPOS/CRIPTO/GDA53691_doc01.tif	HOLOTYPUS. Incluye descripción microscópica	A. Ortega			Holotypus of Cortinarius xanthosarx Vila, A.Ortega & Bidaud in Ballará et al., Fungi Non Delineati, Raro vel Haud Perspecte et Explorate Descripti aut Definite Picti 48-49: 125 (2009)			1
GDA:Fungi-GDA:53684-1-1	2014-01-04T14:09:47	PreservedSpecimen	GDA	Fungi-GDA	53684-1-1	Isotypus	Cortinarius murellensis Cors. Gut., Ballarà, Cadiñanos, Palazón & Mahiques	Fungi	Agaricales	Cortinarius	murellensis			Cors. Gut. et al.	ES	CS	Castellón, Murella, La Carcellera, Mas d´Arsufat	bajo Quercus rotundifolia, Pinus sylvestris y Pinus nigra			2005-10-27	2005-10-27	A. García et al.	http://imagenes.gbif.es:8080/erez/fsi/fsi.swf?FPXSrc=GDA/TIPOS/CRIPTO/GDA53684.tif	ISOTYPUS	A. García et al.			Isotypus of Cortinarius murellensis Cors.Gut., Ballarà, Cadiñanos, Palazón & Mahiques, Butll. Soc. Micol. Valenciana 10: 160 (2005)		MES - 4191	1
GDA:Fungi-GDA:59271-1-1	2014-01-04T14:09:47	PreservedSpecimen	GDA	Fungi-GDA	59271-1-1	Holotypus	Cortinarius cistohelvelloides Bon	Fungi	Agaricales	Cortinarius	cistohelvelloides			Bon	FR		Biot (Alp. Mar.)	Cistes + Ch. liège			1991-11-07	1991-11-07	Bon	http://imagenes.gbif.es:8080/erez/fsi/fsi.swf?FPXSrc=GDA/TIPOS/CRIPTO/GDA59271.tif	HOLOTYPUS Duplicado del Typus (M.B. nº 91244)	Bon			Holotypus of Cortinarius cistohelvelloides Bon, Docums Mycol. 22(85): 52 (1992)		Duplicado del Holotipo 91244	1
GDA:Fungi-GDA:59263-1-1	2014-01-04T14:09:47	PreservedSpecimen	GDA	Fungi-GDA	59263-1-1	Isotypus	Cortinarius aureocistophilus Vila, Contu & Llimona	Fungi	Agaricales	Cortinarius	aureocistophilus			Vila et al.	ES	GE	Gerona, Empordá, Rosas	bajo Cistus albidus y Cistus monspeliensis	95	95	2001-01-23	2001-01-23		http://imagenes.gbif.es:8080/erez/fsi/fsi.swf?FPXSrc=GDA/TIPOS/CRIPTO/GDA59263.tif	ISOTYPUS (9250). Dupl. JVG 1010123-13				Isotypus of Cortinarius aureocistophilus Vila, Contu & Llimona, in Vila & Llimona, Revta. Catal. Micol. 28: 173 (2006)		Duplicado de JVG-1010123-13	1				31T5174676	UTM
GDA:Fungi-GDAC:44584-1-1	2014-01-04T14:09:47	PreservedSpecimen	GDA	Fungi-GDAC	44584-1-1	Isotypus	Cortinarius ayanamii A.Ortega, Vila, Bidaud & Llimona	Fungi	Agaricales	Cortinarius	ayanamii			Ortega et. al.	ES	GE	Gerona, Alto Empordá, Cadaqués, Cala Portaló	bajo Cistus monspeliensis	35	35	1999-01-08	1999-01-08	J. Vila & X. Llimona	http://imagenes.gbif.es:8080/erez/fsi/fsi.swf?FPXSrc=GDA/TIPOS/CRIPTO/GDAC44584.tif; http://imagenes.gbif.es:8080/erez/fsi/fsi.swf?FPXSrc=GDA/TIPOS/CRIPTO/GDAC44584_doc01.tif; http://imagenes.gbif.es:8080/erez/fsi/fsi.swf?FPXSrc=GDA/TIPOS/CRIPTO/GDAC44584_doc02.tif; http://imagenes.gbif.es:8080/erez/fsi/fsi.swf?FPXSrc=GDA/TIPOS/CRIPTO/GDAC44584_doc03.tif	ISOTYPUS. Incluye descripción macro y microscópica (sub C. cf infractu	A. Ortega			Isotypus of Cortinarius ayanamii A.Ortega, Vila, Bidaud & Llimona, Bull. trimest. Féd. Mycol. Dauphiné-Savoie 40(157): 23 (2000)		Duplicado de JVG990108-22	1
GDA:Fungi-GDA:53686-1-1	2014-01-04T14:09:47	PreservedSpecimen	GDA	Fungi-GDA	53686-1-1	Isotypus	Cortinarius benovairensis Mahiques	Fungi	Agaricales	Cortinarius	benovairensis			Mahiques	ES	V	Valencia, Vall d´Albaida Quatretonda, El Benovaire	bajo Quercus ilex subsp. ballota.	260	260	2005-01-06	2005-01-06	R. Mahiques	http://imagenes.gbif.es:8080/erez/fsi/fsi.swf?FPXSrc=GDA/TIPOS/CRIPTO/GDA53686.tif	ISOTYPUS	R. Mahiques			Isotypus of Cortinarius benovairensis Mahiques, Butll. Soc. Micol. Valenciana 9: 129 (2004)		MES - 4114	1				30S0726144 4315282	UTM
GDA:Fungi-GDA:59265-1-1	2014-01-04T14:09:47	PreservedSpecimen	GDA	Fungi-GDA	59265-1-1	Paratypus	Cortinarius ortovernus Ballará & Mahiques	Fungi	Agaricales	Cortinarius	ortovernus			Ballará & Mahiques	ES	B	Barcelona, Berga, Cal Sala	bajo Quercus ilex	750	750	2008-04-26	2008-04-26	J. Ballará	http://imagenes.gbif.es:8080/erez/fsi/fsi.swf?FPXSrc=GDA/TIPOS/CRIPTO/GDA59265.tif	PARATYPUS				Paratypus of Cortinarius ortovernus Ballará & Mahiques, Journal des J.E.C. 11: 55-61 (2009)		MES 4408	1
GDA:Fungi-GDA:53655-1-1	2014-01-04T14:09:47	PreservedSpecimen	GDA	Fungi-GDA	53655-1-1	Isotypus	Cortinarius bombycinus Mahhiques & Burguete	Fungi	Agaricales	Cortinarius	bombycinus			Mahiques & Burguete	ES	TE	Teruel, San Agustín, Mar de Andrés	Quercus ilex subsp. rotundifolia y Quercus faginea	900	900	2001-10-26	2001-10-26	A. Burguete	http://imagenes.gbif.es:8080/erez/fsi/fsi.swf?FPXSrc=GDA/TIPOS/CRIPTO/GDA53655.tif	ISOTYPUS	R. Mahiques			Isotypus of Cortinarius bombycinus Mahiques & Burguete, Butll. Soc. Micol. Valenciana 6: 245 (2001)		MES - 3779	1				30TXK988369	UTM
GDA:Fungi-GDA:53700-1-1	2014-01-04T14:09:47	PreservedSpecimen	GDA	Fungi-GDA	53700-1-1	Isotypus	Cortinarius inusitatus A.Ortega, Bidaud, Suár.-Sant. & Vila	Fungi	Agaricales	Cortinarius	inusitatus			A.Ortega, Bidaud, Suár.-Sant. & Vila	ES	GR	Granada, P.N. Sª de Huétor, camino Forestal las Pajareras, km 0.5	encinar.	1250	1250	2006-11-26	2006-11-26	A. Ortega	http://imagenes.gbif.es:8080/erez/fsi/fsi.swf?FPXSrc=GDA/TIPOS/CRIPTO/GDA53700.tif	ISOTYPUS	A. Ortega			Isotypus of Cortinarius inusitatus A.Ortega, Bidaud, Suár.-Sant. & Vila in Ortega, Suár.-Sant. & Vila, Fungal Diversity 36: 91 (2009)			1
GDA:Fungi-GDA:52914-1-2	2014-03-14T11:00:46	PreservedSpecimen	GDA	Fungi-GDA	52914-1-2	Paratypus	Gymnopilus maritimus Contu et al.	Fungi	Agaricales	Gymnopilus	maritimus			Contu et al.	IT		Pittulongu, Olbia, prov. Sassari, Sardinia	bajo Juncus maritimus.			2006-01-22	2006-01-22	M. Contu		Documenta M.T Vizoso según Mycol. Progr. 8(3): 197 (2009)		01/03/2014		Paratypus of Gymnopilus maritimus Contu et al. in Guzmán-Dávalos, Ortega, Contu, Vizzini, Rodríguez, Villalobos-Arámbula & Santerre, Mycol. Progr. 8(3): 197 (2009)			1
GDA:Fungi-GDA:59274-1-1	2014-01-04T14:09:47	PreservedSpecimen	GDA	Fungi-GDA	59274-1-1	Clastotypus	Cortinarius castaneolens Chevassut & Rob.Henry	Fungi	Agaricales	Cortinarius	castaneolens			Chevassut & Rob.Henry	FR		Hérault, Espinouze, Bois de l´Espinouze	Hetres Epíceas			1980-11-03	1980-11-03	Chev.	http://imagenes.gbif.es:8080/erez/fsi/fsi.swf?FPXSrc=GDA/TIPOS/CRIPTO/GDA59274.tif; http://imagenes.gbif.es:8080/erez/fsi/fsi.swf?FPXSrc=GDA/TIPOS/CRIPTO/GDA59274_doc01a.tif; http://imagenes.gbif.es:8080/erez/fsi/fsi.swf?FPXSrc=GDA/TIPOS/CRIPTO/GDA59274_doc01r.tif	CLASTOTYPUS. Es la mitad del tipo. Incluye carta de G. Chevassut				Clastotypus of Cortinarius castaneolens Chevassut & Rob. Henry, Docums Mycol. 12(47): 37 (1982)		Herbario Chevassut an 3126	1
GDA:Fungi-GDA:53706-1-3	2014-03-14T11:00:46	PreservedSpecimen	GDA	Fungi-GDA	53706-1-3	Paratypus	Cortinarius viscidoamarus A.Ortega & Suár.-Sant.	Fungi	Agaricales	Cortinarius	viscidoamarus			A.Ortega & Suár.-Sant.	ES	GR	Granada, P.N. Sª de Huétor, camino Forestal las Pajareras, km 0.5	encinar.	1250	1250	2006-12-09	2006-12-09	A. Ortega		Documenta M.T Vizoso según Fungal Diversity 36: 91 (2009)		01/03/2014		Paratypus of Cortinarius viscidoamarus A.Ortega & Suár.-Sant. in Ortega, Suár.-Sant. & Vila, Fungal Diversity 36: 95 (2009)	FM202134		1
GDA:Fungi-GDA:53707-1-3	2014-03-14T11:00:46	PreservedSpecimen	GDA	Fungi-GDA	53707-1-3	Paratypus	Cortinarius viscidoamarus A.Ortega & Suár.-Sant.	Fungi	Agaricales	Cortinarius	viscidoamarus			A.Ortega & Suár.-Sant.	ES	GR	Granada, P.N. Sª de Huétor, camino Forestal las Pajareras, km 0.5	encinar.	1250	1250	2006-12-22	2006-12-22	A. Ortega		Documenta M.T Vizoso según Fungal Diversity 36: 91 (2009)		01/03/2014		Paratypus of Cortinarius viscidoamarus A.Ortega & Suár.-Sant. in Ortega, Suár.-Sant. & Vila, Fungal Diversity 36: 95 (2009)	FM202135		1
GDA:Fungi-GDA:53708-1-3	2014-03-14T11:00:46	PreservedSpecimen	GDA	Fungi-GDA	53708-1-3	Paratypus	Cortinarius viscidoamarus A.Ortega & Suár.-Sant.	Fungi	Agaricales	Cortinarius	viscidoamarus			A.Ortega & Suár.-Sant.	ES	GR	Granada, P.N. Sª de Huétor, camino Forestal las Pajareras, km 0.5	encinar.	1250	1250	2006-12-29	2006-12-29	A. Ortega		Documenta M.T Vizoso según Fungal Diversity 36: 91 (2009)		01/03/2014		Paratypus of Cortinarius viscidoamarus A.Ortega & Suár.-Sant. in Ortega, Suár.-Sant. & Vila, Fungal Diversity 36: 95 (2009)	FM202136		1
GDA:Fungi-GDA:53710-1-2	2014-03-14T11:00:46	PreservedSpecimen	GDA	Fungi-GDA	53710-1-2	Paratypus	Cortinarius viscidoamarus A.Ortega & Suár.-Sant.	Fungi	Agaricales	Cortinarius	viscidoamarus			A.Ortega & Suár.-Sant.	ES	GR	Granada, P.N. Sª de Huétor, camino Forestal las Pajareras, km 0.5	encinar.	1250	1250	2007-11-11	2007-11-11	A. Ortega		Documenta M.T Vizoso según Fungal Diversity 36: 91 (2009)		01/03/2014		Paratypus of Cortinarius viscidoamarus A.Ortega & Suár.-Sant. in Ortega, Suár.-Sant. & Vila, Fungal Diversity 36: 95 (2009)	FM202138		1
GDA:Fungi-GDA:47386-1-4	2014-03-14T11:00:46	PreservedSpecimen	GDA	Fungi-GDA	47386-1-4	Paratypus	Gymnopilus arenophilus A. Ortega & Esteve-Rav.	Fungi	Agaricales	Gymnopilus	arenophilus			A. Ortega & Esteve-Rav.	ES	SE	Sevilla, Aznalcózar, Pinar de Aznalcózar	suelos arenosos, bajo pinos.			2000-12-02	2000-12-02	L. Alcoba & A. Ortega		Documenta M.T Vizoso según Persoonia 18(4): 506 (2005)		01/03/2014		Paratypus of Gymnopilus arenophilus A. Ortega & Esteve-Rav., Persoonia 18(4): 506 (2005)			1
GDA:Fungi-GDA:53704-1-2	2014-03-14T11:00:46	PreservedSpecimen	GDA	Fungi-GDA	53704-1-2	Paratypus	Cortinarius viscidoamarus A.Ortega & Suár.-Sant.	Fungi	Agaricales	Cortinarius	viscidoamarus			A.Ortega & Suár.-Sant.	ES	GR	Granada, P.N. Sª de Huétor, camino Forestal las Pajareras, km 0.5	encinar.	1250	1250	2006-11-26	2006-11-26	A. Ortega		Documenta M.T Vizoso según Fungal Diversity 36: 91 (2009)		01/03/2014		Paratypus of Cortinarius viscidoamarus A.Ortega & Suár.-Sant. in Ortega, Suár.-Sant. & Vila, Fungal Diversity 36: 95 (2009)	FM202132		1
GDA:Fungi-GDA:47388-1-4	2014-03-14T11:00:46	PreservedSpecimen	GDA	Fungi-GDA	47388-1-4	Paratypus	Gymnopilus arenophilus A. Ortega & Esteve Rav.	Fungi	Agaricales	Gymnopilus	arenophilus			A. Ortega & Esteve Rav.	ES	SE	Sevilla, Aznalcózar, Pinar de Aznalcózar	suelo.			2002-11-30	2002-11-30	L. Alcoba & A. Ortega		Documenta M.T Vizoso según Persoonia 18(4): 506 (2005)		01/03/2014		Paratypus of Gymnopilus arenophilus A. Ortega & Esteve-Rav., Persoonia 18(4): 506 (2005)			1
GDA:Fungi-GDA:53703-1-2	2014-03-14T11:00:46	PreservedSpecimen	GDA	Fungi-GDA	53703-1-2	Paratypus	Cortinarius viscidoamarus A.Ortega & Suár.-Sant.	Fungi	Agaricales	Cortinarius	viscidoamarus			A.Ortega & Suár.-Sant.	ES	GR	Granada, P.N. Sª de Huétor, pista de las Pajareras, km 0.5	encinar.	1250	1250	2005-12-17	2005-12-17	A. Ortega		Documenta M.T Vizoso según Fungal Diversity 36: 91 (2009)		01/03/2014		Paratypus of Cortinarius viscidoamarus A.Ortega & Suár.-Sant. in Ortega, Suár.-Sant. & Vila, Fungal Diversity 36: 95 (2009)	FM202131		1
GDA:Fungi-GDA:52915-1-2	2014-03-14T11:00:46	PreservedSpecimen	GDA	Fungi-GDA	52915-1-2	Paratypus	Gymnopilus maritimus Contu et al.	Fungi	Agaricales	Gymnopilus	maritimus			Contu et al.	IT		Pittulongu, Olbia, prov. Sassari, Sardinia	bajo Juncus maritimus.			2006-10-25	2006-10-25	M. Contu		Documenta M.T Vizoso según Mycol. Progr. 8(3): 197 (2009)		01/03/2014		Paratypus of Gymnopilus maritimus Contu et al. in Guzmán-Dávalos, Ortega, Contu, Vizzini, Rodríguez, Villalobos-Arámbula & Santerre, Mycol. Progr. 8(3): 197 (2009)			1
GDA:Fungi-GDA:52916-1-2	2014-03-14T11:00:46	PreservedSpecimen	GDA	Fungi-GDA	52916-1-2	Paratypus	Gymnopilus maritimus Contu et al.	Fungi	Agaricales	Gymnopilus	maritimus			Contu et al.	IT		Pittulongu, Olbia, prov. Sassari, Sardinia	bajo Juncus maritimus.			2006-12-28	2006-12-28	M. Contu		Documenta M.T Vizoso según Mycol. Progr. 8(3): 197 (2009)		01/03/2014		Paratypus of Gymnopilus maritimus Contu et al. in Guzmán-Dávalos, Ortega, Contu, Vizzini, Rodríguez, Villalobos-Arámbula & Santerre, Mycol. Progr. 8(3): 197 (2009)			1
GDA:Fungi-GDA:52917-1-2	2014-03-14T11:00:46	PreservedSpecimen	GDA	Fungi-GDA	52917-1-2	Paratypus	Gymnopilus maritimus Contu et al.	Fungi	Agaricales	Gymnopilus	maritimus			Contu et al.	IT		Pittulongu, Olbia, prov. Sassari, Sardinia	bajo Juncus maritimus.			2006-12-30	2006-12-30	M. Contu		Documenta M.T Vizoso según Mycol. Progr. 8(3): 197 (2009)		01/03/2014		Paratypus of Gymnopilus maritimus Contu et al. in Guzmán-Dávalos, Ortega, Contu, Vizzini, Rodríguez, Villalobos-Arámbula & Santerre, Mycol. Progr. 8(3): 197 (2009)			1
GDA:Fungi-GDA:52918-1-2	2014-03-14T11:00:46	PreservedSpecimen	GDA	Fungi-GDA	52918-1-2	Paratypus	Gymnopilus maritimus Contu et al.	Fungi	Agaricales	Gymnopilus	maritimus			Contu et al.	IT		Pittulongu, Olbia, prov. Sassari, Sardinia	bajo Juncus maritimus.			2007-01-01	2007-01-01	M. Contu		Documenta M.T Vizoso según Mycol. Progr. 8(3): 197 (2009)		01/03/2014		Paratypus of Gymnopilus maritimus Contu et al. in Guzmán-Dávalos, Ortega, Contu, Vizzini, Rodríguez, Villalobos-Arámbula & Santerre, Mycol. Progr. 8(3): 197 (2009)			1
GDA:Fungi-GDAC:36231-1-4	2014-03-14T11:00:46	PreservedSpecimen	GDA	Fungi-GDAC	36231-1-4	Paratypus	Gymnopus pubipes Antonín, A. Ortega & Esteve-Rav.	Fungi	Agaricales	Gymnopus	pubipes			Antonín, A. Ortega & Esteve-Rav.	ES	GR	Granada, Parque Natural Sª de Baza	bajo Juniperus communis, pinar de cala			1992-11-03	1992-11-03	A.Ortega & D. Sousa		Documenta M.T Vizoso según Mycotaxon 85: 69 (2003)		01/03/2014		Paratypus of Gymnopus pubipes Antonín, A. Ortega & Esteve-Rav. in Ortega, Antonín & Esteve-Raventós, Mycotaxon 85: 69 (2003)			1
GDA:Fungi-GDA:44742-1-2	2014-03-14T11:00:46	PreservedSpecimen	GDA	Fungi-GDA	44742-1-2	Paratypus	Gymnopus pubipes Antonín, A.Ortega & Esteve-Rav.	Fungi	Agaricales	Gymnopus	pubipes			Antonín, A.Ortega & Esteve-Rav.	ES	GR	Granada, Lanteira, Parque Natural de Sª Nevada.	bajo Salix atrocinerea.			1999-11-13	1999-11-13	A.Capilla, F.Esteve-Raventós & A.Ortega		Documenta M.T Vizoso según Mycotaxon 85: 69 (2003)		01/03/2014		Paratypus of Gymnopus pubipes Antonín, A. Ortega & Esteve-Rav. in Ortega, Antonín & Esteve-Raventós, Mycotaxon 85: 69 (2003)			1
GDA:Fungi-GDA:47387-1-4	2014-03-14T11:00:46	PreservedSpecimen	GDA	Fungi-GDA	47387-1-4	Paratypus	Gymnopilus arenophilus A. Ortega & Esteve-Rav.	Fungi	Agaricales	Gymnopilus	arenophilus			A. Ortega & Esteve-Rav.	ES	SE	Sevilla, Aznalcózar	suelo de pinar.			2001-01-19	2001-01-19	L. Alcoba & A. Ortega		Documenta M.T Vizoso según Persoonia 18(4): 506 (2005)		01/03/2014		Paratypus of Gymnopilus arenophilus A. Ortega & Esteve-Rav., Persoonia 18(4): 506 (2005)			1
GDA:Fungi-GDA:58694-1-1	2014-01-04T14:09:47	PreservedSpecimen	GDA	Fungi-GDA	58694-1-1	Topotypus	Cortinarius xerophilus Contu & Rob.Henry	Fungi	Agaricales	Cortinarius	xerophilus			Contu & Henry	IT		Sardegna, Cagliari, Maracalagonis	sotto Cistus monspeliensis in terreno acido e molto degradato			1988-01-06	1988-01-06	M. Contu	http://imagenes.gbif.es:8080/erez/fsi/fsi.swf?FPXSrc=GDA/TIPOS/CRIPTO/GDA58694.tif	TOPOTYPUS	M. Contú			Topotypus of Cortinarius xerophilus Contu & Rob.Henry, Docums Mycol. 16(63-64): 63 (1986)		Duplex 880106/06	1
GDA:Fungi-GDAC:41040-1-2	2014-01-04T14:09:47	PreservedSpecimen	GDA	Fungi-GDAC	41040-1-2	Holotypus	Cortinarius conico-obtusarum A.Ortega & Chevassut	Fungi	Agaricales	Cortinarius	conico-obtusarum			A. Ortega & Chevassut	ES	CA	Cádiz, proximidades de Grazalema	alcornocal aclarado, bajo Cistus.			1996-12-13	1996-12-13	A. Ortega & L. Alcoba	http://imagenes.gbif.es:8080/erez/fsi/fsi.swf?FPXSrc=GDA/TIPOS/CRIPTO/GDAC41040.tif; http://imagenes.gbif.es:8080/erez/fsi/fsi.swf?FPXSrc=GDA/TIPOS/CRIPTO/GDAC41040_doc01.tif; http://imagenes.gbif.es:8080/erez/fsi/fsi.swf?FPXSrc=GDA/TIPOS/CRIPTO/GDAC41040_doc02.tif; http://imagenes.gbif.es:8080/erez/fsi/fsi.swf?FPXSrc=GDA/TIPOS/CRIPTO/GDAC41040_esporas1.tif; http://imagenes.gbif.es:8080/erez/fsi/…	HOLOTYPUS. Incluye fotografías de esporas a microscopio electrónico	A. Ortega	2002-02		Holotypus of Cortinarius conico-obtusarum A.Ortega & Chevassut, Docums Mycol. 29(114): 79 (1999)			1
GDA:Fungi-GDA:44743-1-2	2014-03-14T11:00:46	PreservedSpecimen	GDA	Fungi-GDA	44743-1-2	Paratypus	Gymnopus pubipes Antonín, A.Ortega & Esteve-Rav.	Fungi	Agaricales	Gymnopus	pubipes			Antonín, A.Ortega & Esteve-Rav.	ES	GR	Granada, Juviles, Parque Natural de Sª Nevada.	bajo Pinus sylvestris.			2000-10-28	2000-10-28	L. Alcoba & A.Ortega		Documenta M.T Vizoso según Mycotaxon 85: 69 (2003)		01/03/2014		Paratypus of Gymnopus pubipes Antonín, A. Ortega & Esteve-Rav. in Ortega, Antonín & Esteve-Raventós, Mycotaxon 85: 69 (2003)			1
GDA:Fungi-GDA:59273-1-1	2014-01-04T14:09:47	PreservedSpecimen	GDA	Fungi-GDA	59273-1-1	Clastotypus	Cortinarius castaneoduracinus Chevassut & Rob.Henry	Fungi	Agaricales	Cortinarius	castaneoduracinus			Chevassut & Rob.Henry	FR		Espinouze	Hetres Epíceas			1980-10-26	1980-10-26	Chev.	http://imagenes.gbif.es:8080/erez/fsi/fsi.swf?FPXSrc=GDA/TIPOS/CRIPTO/GDA59273.tif	CLASTOTYPUS. Mitad del holotipo que corresponde a Chev. nº 3123				Clastotypus of Cortinarius castaneoduracinus Chevassut & Rob. Henry, Docums Mycol. 12(47): 64 (1982)		Herbario Chevassut an 3122	1
GDA:Fungi-GDA:53788-1-1	2014-01-04T14:09:47	PreservedSpecimen	GDA	Fungi-GDA	53788-1-1	Isotypus	Cortinarius acutopholiotoides Palazón & Mahiques	Fungi	Agaricales	Cortinarius	acutopholiotoides			Palazón & Mahiques	ES	ZA	Zamora, San Pedro de Ceque	Quercus pyrenaica y Quercus ilex	784	784	2006-11-08	2006-11-08	J.C. Campos et al.	http://imagenes.gbif.es:8080/erez/fsi/fsi.swf?FPXSrc=GDA/TIPOS/CRIPTO/GDA53788.tif	ISOTYPUS. Holotypus en Herbario GIC-061108-1	R. Mahiques			Isotypus of Cortinarius acutopholiotoides Palazón & Mahiques, Journal des JEC, 10(9): 77 (2007)			1				29TQG3988459249	UTM
GDA:Fungi-GDA:59270-1-1	2014-01-04T14:09:47	PreservedSpecimen	GDA	Fungi-GDA	59270-1-1	Paratypus	Cortinarius cistohelvelloides Bon	Fungi	Agaricales	Cortinarius	cistohelvelloides			Bon	FR		Isla de Porquerolles	Cistus salviifolius y Cistus monspeliensis			1991-11-09	1991-11-09	Bon	http://imagenes.gbif.es:8080/erez/fsi/fsi.swf?FPXSrc=GDA/TIPOS/CRIPTO/GDA59270.tif	en información original es isotipo, en Docums Mycol. 22(85): 52 (1992) es paratipo.	Bon			Paratypus of Cortinarius cistohelvelloides Bon, Docums Mycol. 22(85): 52 (1992)		Duplicado 91244 Ter	1
GDA:Fungi-GDAC:8130-1-1	2014-01-04T14:09:47	PreservedSpecimen	GDA	Fungi-GDAC	8130-1-1	Holotypus	Naucoria decolorata Malençon ex R.Galán, G.Moreno & A.Ortega	Fungi	Agaricales	Naucoria	decolorata			Malençon ex R. Galán, G. Moreno & A. Ortega	ES	GR	Granada, Alhama de Granada	sobre madera de Quercus rotundifolia junto a Mycena corticola			1980-11-11	1980-11-11	C. Gil & R. Galán	http://imagenes.gbif.es:8080/erez/fsi/fsi.swf?FPXSrc=GDA/TIPOS/CRIPTO/GDAC8130.tif; http://imagenes.gbif.es:8080/erez/fsi/fsi.swf?FPXSrc=GDA/TIPOS/CRIPTO/GDAC8130_doc01.tif	HOLOTYPUS	A. Ortega & R. Galán			Holotypus of Naucoria decolorata Malençon ex R.Galán, G.Moreno & A.Ortega in Galán, Ortega & Moreno, Revta Biol., Lisb. 12(1-2): 62 (1983)			1				30SVF0991	UTM
GDA:Fungi-GDA:53705-1-2	2014-03-14T11:00:46	PreservedSpecimen	GDA	Fungi-GDA	53705-1-2	Paratypus	Cortinarius viscidoamarus A.Ortega & Suár.-Sant.	Fungi	Agaricales	Cortinarius	viscidoamarus			A.Ortega & Suár.-Sant.	ES	GR	Granada, P.N. Sª de Huétor, camino Forestal las Pajareras, km 0.5	encinar.	1250	1250	2006-12-02	2006-12-02	A. Ortega		Documenta M.T Vizoso según Fungal Diversity 36: 91 (2009)		01/03/2014		Paratypus of Cortinarius viscidoamarus A.Ortega & Suár.-Sant. in Ortega, Suár.-Sant. & Vila, Fungal Diversity 36: 95 (2009)	FM202133		1
GDA:Fungi-GDAC:38854-2-1	2014-01-04T14:09:47	PreservedSpecimen	GDA	Fungi-GDAC	38854-2-1	Clastotypus	Cortinarius diabolicoides Moënne-Locc. & Reumaux	Fungi	Agaricales	Cortinarius	diabolicoides			Moënne Loccos et Reum.	FR		France	in deciduous forest						http://imagenes.gbif.es:8080/erez/fsi/fsi.swf?FPXSrc=GDA/TIPOS/CRIPTO/GDAC38854.tif; http://imagenes.gbif.es:8080/erez/fsi/fsi.swf?FPXSrc=GDA/TIPOS/CRIPTO/GDAC38854_doc01.tif; http://imagenes.gbif.es:8080/erez/fsi/fsi.swf?FPXSrc=GDA/TIPOS/CRIPTO/GDAC38854_doc02.tif	Incluye comparativa de esporas de C. diabolicoides y C. anomalus-ochrascens				Clastotypus of Cortinarius diabolicoides Moënne-Locc. & Reumaux, in Bidaud, Henry, Moënne-Loccoz & Reumaux, Atlas de Cortinares 4 (Annecy) 4: 105 (1992)		Parte del Holotype in herb.GK. 2385	1
GDA:Fungi-GDAC:39965-1-2	2014-01-04T14:09:47	PreservedSpecimen	GDA	Fungi-GDAC	39965-1-2	Isotypus	Bolbitius elegans E.Horak, G.Moreno, A.Ortega & Esteve-Rav.	Fungi	Agaricales	Bolbitius	elegans			E.Horak, G.Moreno, A.Ortega & Esteve.Rav.	ES	MA	Málaga, Ronda, Sª de las Nieves, cerca del refugio Félix Rodríguez de la Fuente	excrementos de caballo			1994-11-02	1994-11-02	F. Esteve-Raventós, E. Horak, A.Ortega & L. Alcoba	http://imagenes.gbif.es:8080/erez/fsi/fsi.swf?FPXSrc=GDA/TIPOS/CRIPTO/GDAC39965.tif; http://imagenes.gbif.es:8080/erez/fsi/fsi.swf?FPXSrc=GDA/TIPOS/CRIPTO/GDAC39965_doc01.tif	ISOTYPUS. Incluye descripción macro y microscópica (sub Bolbitius sp.)	A. Ortega	2002		Isotypus of Bolbitius elegans E.Horak, G.Moreno, A.Ortega & Esteve-Rav., Persoonia 17(4): 615 (2002)			1
GDA:Fungi-GDA:52913-1-1	2014-01-04T14:09:47	PreservedSpecimen	GDA	Fungi-GDA	52913-1-1	Isotypus	Gymnopilus maritimus Contu, Guzm.-Dáv., A.Ortega & Vizzini	Fungi	Agaricales	Gymnopilus	maritimus			Contu et al.	IT		Pittulongu, Olbia, prov. Sassari, Sardinia	bajo Juncus maritimus en suelos arenosos costeros.			2006-01-15	2006-01-15	M. Contu	http://imagenes.gbif.es:8080/erez/fsi/fsi.swf?FPXSrc=GDA/TIPOS/CRIPTO/GDA52913.tif; http://imagenes.gbif.es:8080/erez/fsi/fsi.swf?FPXSrc=GDA/TIPOS/CRIPTO/GDA52913_doc01.tif	ISOTYPUS. Incluye esporada y medidas esporales	L. Guzmán - D. & A. Ortega			Isotypus of Gymnopilus maritimus Contu, Guzm.-Dáv., A.Ortega & Vizzini, in Guzmán-Dávalos, Ortega, Contu, Vizzini, Rodríguez, Villalobos-Arámbula & Santerre, Mycol. Progr. 8(3): 197 (2009)			1
GDA:Fungi-GDA:53339-1-1	2014-01-04T14:09:47	PreservedSpecimen	GDA	Fungi-GDA	53339-1-1	Isotypus	Rugosomyces pudicus Bon & Contu	Fungi	Agaricales	Rugosomyces	pudicus			Bon & Contu	IT		Sardegna, prov. Sassari, Olbia-Citta, Parco Sportivo F. Noce	presso Populus sp.			1999-10-28	1999-10-28	F. Carvajal	http://imagenes.gbif.es:8080/erez/fsi/fsi.swf?FPXSrc=GDA/TIPOS/CRIPTO/GDA53339.tif; http://imagenes.gbif.es:8080/erez/fsi/fsi.swf?FPXSrc=GDA/TIPOS/CRIPTO/GDA53339_1.tif; http://imagenes.gbif.es:8080/erez/fsi/fsi.swf?FPXSrc=GDA/TIPOS/CRIPTO/GDA53339_doc01.tif; http://imagenes.gbif.es:8080/erez/fsi/fsi.swf?FPXSrc=GDA/TIPOS/CRIPTO/GDA53339_doc02.tif	ISOTYPUS	M. Contu			Isotypus of Rugosomyces pudicus Bon & Contu in Contu & Bon, Docums Mycol. 29(116): 35 (2000)		Herbarium privatum Marco Contu, regalo para A. Ortega	1
GDA:Fungi-GDAC:36731-1-1	2014-01-04T14:09:47	PreservedSpecimen	GDA	Fungi-GDAC	36731-1-1	Clastotypus	Cortinarius crustulinus Malençon	Fungi	Agaricales	Cortinarius	crustulinus			Malençon	MA		Marruecos, Azrou	Quercetum ilicis	1600	1600	1943-10-27	1943-10-27	G. Malençon	http://imagenes.gbif.es:8080/erez/fsi/fsi.swf?FPXSrc=GDA/TIPOS/CRIPTO/GDAC36731.tif; http://imagenes.gbif.es:8080/erez/fsi/fsi.swf?FPXSrc=GDA/TIPOS/CRIPTO/GDAC36731_doc01.tif	CLASTOTYPUS (Typus Herb. G. Malençon nº 1410) Incluye dibujo y medidas	G. Malençon			Clastotypus of Cortinarius crustulinus Malençon, in Malençon & Bertault, Champignon Supérieurs du Maroc 1: 495 (1970)		Herb. G. Malençon nº 1410	1
GDA:Fungi-GDA:52536-1-3	2014-03-14T11:00:46	PreservedSpecimen	GDA	Fungi-GDA	52536-1-3	Paratypus	Cortinarius contui Rob.Henry & Contu	Fungi	Agaricales	Cortinarius	contui			Rob. Henry & Contu	ES	GE	Gerona, Roses, Alt Empordá, Coll de la Peralita	Cistus monspeliensis.	250	250	2000-11-28	2000-11-28	J. Vila & X. Llimona	http://imagenes.gbif.es:8080/erez/fsi/fsi.swf?FPXSrc=GDA/TIPOS/CRIPTO/GDA52536	Documenta M.T Vizoso según Ortega et al., Mycotaxon 101: 145 (2007)		01/03/2014		Paratypus of Cortinarius contui Rob.Henry & Contu in Ortega, Vila, Bidaud, Mahiques & Contu, Mycotaxon 101: 145 (2007)			1
GDA:Fungi-GDA:53701-1-3	2014-03-14T11:00:46	PreservedSpecimen	GDA	Fungi-GDA	53701-1-3	Paratypus	Cortinarius inusitatus A.Ortega, Bidaud, Suár.-Sant. & Vila	Fungi	Agaricales	Cortinarius	inusitatus			A.Ortega, Bidaud, Suár.-Sant. & Vila	ES	GR	Granada, P.N. Sª de Huétor, camino forestal las Pajareras, km 0.5	encinar.	1250	1250	2006-12-02	2006-12-02	A. Ortega		Documenta M.T Vizoso según Fungal Diversity 36: 91 (2009)		01/02/2014		Paratypus of Cortinarius inusitatus A.Ortega, Bidaud, Suár.-Sant. & Vila in Ortega, Suár.-Sant. & Vila, Fungal Diversity 36: 91 (2009)	FM202129		1
GDA:Fungi-GDA:53702-1-3	2014-03-14T11:00:46	PreservedSpecimen	GDA	Fungi-GDA	53702-1-3	Paratypus	Cortinarius inusitatus A.Ortega, Bidaud, Suár.-Sant. & Vila	Fungi	Agaricales	Cortinarius	inusitatus			A.Ortega, Bidaud, Suár.-Sant. & Vila	ES	GR	Granada, P.N. Sª de Huétor, camino forestal de las Pajareras, km 0.5	encinar y jaras.	1250	1250	2006-12-09	2006-12-09	A. Ortega		Documenta M.T Vizoso según Fungal Diversity 36: 91 (2009)		01/02/2014		Paratypus of Cortinarius inusitatus A.Ortega, Bidaud, Suár.-Sant. & Vila in Ortega, Suár.-Sant. & Vila, Fungal Diversity 36: 91 (2009)	FM202130		1
GDA:Fungi-GDA:59056-1-1	2014-01-04T14:09:47	PreservedSpecimen	GDA	Fungi-GDA	59056-1-1	Clastotypus	Cortinarius decipiens (Pers.) Fr.	Fungi	Agaricales	Cortinarius	decipiens			(Pers.) Fr.	FR		Haute Savoie, Pessiére d´Artith				1986-10-01	1986-10-01	P. Moënne-Loccoz	http://imagenes.gbif.es:8080/erez/fsi/fsi.swf?FPXSrc=GDA/TIPOS/CRIPTO/GDA59056.tif; http://imagenes.gbif.es:8080/erez/fsi/fsi.swf?FPXSrc=GDA/TIPOS/CRIPTO/GDA59056_doc01.tif	CLASTOTYPUS, fragmento del Neotypus (Herb. P.Moënne-Loccoz nº 366)	P. Reumaux			Clastotypus (neotypus) of Cortinarius decipiens (Pers.) Fr., in Moënne-Loccoz & Reumaux Atlas des Cortinaires II:.pl. 29 (1990)		PML. ex. n´366	1
GDA:Fungi-GDAC:32696-1-1	2014-01-04T14:09:47	PreservedSpecimen	GDA	Fungi-GDAC	32696-1-1	Holotypus	Sarcodon mediterraneus A.Ortega & Contu	Fungi	Aphyllophorales	Sarcodon	mediterraneus			Ortega & Contu	ES	AL	Almería, Punta del Sabinal	dunas costeras, bajo Juniperus phoenicea			1987-03-25	1987-03-25	A. Ortega	http://imagenes.gbif.es:8080/erez/fsi/fsi.swf?FPXSrc=GDA/TIPOS/CRIPTO/GDAC32696.tif	HOLOTYPUS	A. Ortega			Holotypus of Sarcodon mediterraneus A.Ortega & Contu in Bol. Soc. Micol. Madrid 15: 149 (1991)			1
GDA:Fungi-GDA:58364-1-1	2014-01-04T14:09:47	PreservedSpecimen	GDA	Fungi-GDA	58364-1-1	Holotypus	Kabatiella bupleuri Bills	Fungi	Dothideales	Kabatiella	bupleuri			Bills.	ES	GR	Granada, Pinos Genil, Embalse de Canales	sterms flowers and leaves dead over Bupleurum gibraltaricum			2011-05-03	2011-05-03	G. Platas & al.	http://imagenes.gbif.es:8080/erez/fsi/fsi.swf?FPXSrc=GDA/TIPOS/CRIPTO/GDA58364.tif	HOLOTYPUS. Strain numbers F-278240, CFB-02732-1 ex-Holotipe culture				Holotypus of Kabatiella bupleuri Bills, Mycologia 104:966 (2012)		F-278240, CFB-02732-1 ex-Holotipe culture	1
GDA:Fungi-GDA:51596-1-1	2014-01-04T14:09:47	PreservedSpecimen	GDA	Fungi-GDA	51596-1-1	Holotypus	Glomus custos C. Cano & Dalpé	Fungi	Glomerales	Glomus	custos			C. Cano & Y. Dalpé	ES	H	Huelva, Rio Tinto	rizosfera de plantas la mayoría de Compuestas (Chamaemelum, Carduus, Chrisanhemum) Boraginaceas (Echium), Cistaceas (Cistus) y Gramineas (Avena)			2003-04-04	2003-04-04	C. Cano	http://imagenes.gbif.es:8080/erez/fsi/fsi.swf?FPXSrc=GDA/TIPOS/CRIPTO/GDA51596.tif	HOLOTYPUS. Preparación de esporas en reactivo de Melzer				Holotypus of Glomus custos C. Cano & Dalpé, Mycotaxon 109: 502 (2009)			1	-6.58	37.7		37º42'N 06º35'W	degrees minutes seconds
GDA:Fungi-GDA:51597-1-1	2014-01-04T14:09:47	PreservedSpecimen	GDA	Fungi-GDA	51597-1-1	Isotypus	Glomus custos C. Cano & Dalpé	Fungi	Glomerales	Glomus	custos			C. Cano & Y. Dalpé	ES	H	Huelva, Rio Tinto	rizosfera de plantas la mayoría de Compuestas (Chamaemelum, Carduus, Chrisanhemum) Boraginaceas (Echium), Cistaceas (Cistus) y Gramineas (Avena)			2003-04-04	2003-04-04	C. Cano	http://imagenes.gbif.es:8080/erez/fsi/fsi.swf?FPXSrc=GDA/TIPOS/CRIPTO/GDA51597.tif	ISOTYPUS. Preparación de esporas en PVLG.				Isotypus of Glomus custos C. Cano & Dalpé, Mycotaxon 109: 502 (2009)			1	-6.58	37.7		37º42'N 06º35'W	degrees minutes seconds
GDA:Lichen-GDA:112-1-1	2014-01-04T14:09:47	PreservedSpecimen	GDA	Lichen-GDA	112-1-1	Isotypus	Bacidia subtilis Vêzda	Fungi	Lecanorales	Bacidia	subtilis			Vêzda	CZ	NBO	Bohemoslovacia.Bohemia sept. Montes Corcondici (krkonose), in valle rivi Mumlava prope pagum Harrachov	ad ramulos et folia Piceae excelsae	800	800	1960-07-26	1960-07-26	A.Vêzda	http://imagenes.gbif.es:8080/erez/fsi/fsi.swf?FPXSrc=GDA/TIPOS/CRIPTO/GDA112.tif	Herbarium A.Vêzda				Isotypus of Bacidia subtilis Vêzda in Preslia 33: 367 (1961)			1
GDA:Lichen-GDA:1972-2-1	2014-01-04T14:09:47	PreservedSpecimen	GDA	Lichen-GDA	1972-2-1	Holotypus	Lecidea circinarioides Casares & Hafellner	Fungi	Lecanorales	Lecidea	circinarioides			Casares & Hafellner	ES	AL	Tabernas, Venta de los Yesos	sobre cristales de yeso alterados	570	570	1990-07-27	1990-07-27	M. Casares	http://imagenes.gbif.es:8080/erez/fsi/fsi.swf?FPXSrc=GDA/TIPOS/CRIPTO/GDA1972-2.tif		M. Casares			Holotypus of Lecidea circinarioides Casares & Hafellner in Lichenologist 28(1): 41 (1996)			1	-2.297	37.085	707	30SWG6204	UTM
GDA:Lichen-GDA:1975-2-1	2014-01-04T14:09:47	PreservedSpecimen	GDA	Lichen-GDA	1975-2-1	Isotypus	Lecidea circinarioides Casares & Hafellner	Fungi	Lecanorales	Lecidea	circinarioides			Casares & Hafellner	ES	AL	Tabernas, Venta de los Yesos	sobre cristales de yeso alterados	570	570	1990-07-27	1990-07-27	M. Casares	http://imagenes.gbif.es:8080/erez/fsi/fsi.swf?FPXSrc=GDA/TIPOS/CRIPTO/GDA1975-2.tif		M. Casares			Isotypus of Lecidea circinarioides Casares & Hafellner in Lichenologist 28(1): 41 (1996)			1	-2.297	37.085	707	30SWG6204	UTM
GDA:Fungi-GDAC:23712-1-1	2014-01-04T14:09:47	PreservedSpecimen	GDA	Fungi-GDAC	23712-1-1	Clastotypus	Trichophaea fuscoatra var. punctata Malençon	Fungi	Pezizales	Trichophaea	fusco-atra	punctata	var.	G. Malençon	ES	GR	Granada, Sierra de Huétor, Arroyo de las Perdices.	en tierra, sobre un talud desnudo			1977-10-17	1977-10-17	G. Malençon	http://imagenes.gbif.es:8080/erez/fsi/fsi.swf?FPXSrc=GDA/TIPOS/CRIPTO/GDAC23712.tif	CLASTOTYPUS. Fragmento Typus Herb. Criptogamia de Malençon, G 29	G. Malençon			Clastotypus of Trichophaea fuscoatra var. punctata Malençon in Malençon & Llimona, Anales de Biología, Universidad de Murcia 34(1-4): 58 (1980)		Fragmento Typus Herb. Criptogamia de Malençon, G 29	1

## Sheet: Figures_Tables
TypeStatus	Nº Specimens
Holotypes	25
Isotypes	18
Neotypes	1
Clastotypes	6
Paratypes	36
Epitypes	1
Topotypes	1
	88
Order	Nº type-specimens
Agaricales	80
Aphyllophorales	1
Dothideales	1
Glomerales	2
Lecanorales	3
Pezizales	1
	88
Genus	Nº taxa with type-specimens
Baeospora	1
Bolbitius	1
Conocybe	1
Coprinus	1
Cortinarius	29
Entoloma	1
Gymnopilus	2
Gymnopus	2
Hydropus	1
Marasmiellus	1
Mycena	1
Naucoria	1
Rugosomyces	1
	43
